# Supplementary material for: Classifying the Topology of AHL-Driven Quorum Sensing Circuits in Proteobacterial Genomes
Source: PubMed Central journal article supplement (PMC3386692; doi:10.3390/s120505432), 2012-04-27
Supplement: sensors-12-05432-s001.pdf [file sensors-12-05432-s001.pdf]

Supplementary Information

## Classifying the Topology of AHL-Driven Quorum Sensing Circuits in Proteobacterial Genomes. *Sensors* 2012, 12, 5342-5444

Zsolt Gelencsér <sup>1</sup>, Kumari Sonal Choudhary <sup>2</sup>, Bruna Goncalves Coutinho <sup>2,3</sup>, Sanjarbek Hudaiberdiev <sup>2</sup>, Borisz Galbáts <sup>1,4</sup>, Vittorio Venturi <sup>2,\*</sup> and Sándor Pongor <sup>2,\*</sup>

<sup>1</sup> Faculty of Information Technology, PázmányPéter Catholic University, Práter u. 50/a, Budapest 1083, Hungary; E-Mails: gelzsolt@gmail.com (Z.G.); galbo@digitus.itk.ppke.hu (B.G.)

<sup>2</sup> International Centre for Genetic Engineering and Biotechnology (ICGEB), Padriciano 99, Trieste 32149, Italy; E-Mails: sonal.kumari@icgeb.org (K.S.C.); coutinho@icgeb.org (B.G.C.); sanjarbek.hudaiberdiev@icgeb.org (S.H.)

<sup>3</sup> The Capes Foundation, Ministry of Education of Brazil, Cx postal 250, Brasilia, DF 70.040-020, Brazil

<sup>4</sup> Biological Research Center, Temesvári krt 62, Szeged 6726, Hungary

\* Authors to whom correspondence should be addressed; E-Mails: venturi@icgeb.org (V.V.); pongor@icgeb.org (S.P.); Tel.: +39-040-3751; Fax: +39-040-226-555.

---

Zsolt Gelencsér *et al.* (2012): "Classifying the topology of simple AHL-driven quorum sensing circuits in bacterial genomes" submitted to *Sensors*.

**Data:** Data of 1403 complete bacterial genomes were retrieved from the genome section of the NCBI (<http://ncbi.nlm.nih.gov/>). Additional protein sequences were retrieved from the UNIPROT database (<http://www.uniprot.org/>). Data retrieval was completed in December 15, 2011.

**Methods:** QS genes were determined using Hidden Markov Model (HMM) recognizers build with the HMMER programs HMMER 3.0, (<http://hmmer.janelia.org/>). Briefly, a core set of protein sequences were taken for *LuxR*, *LuxI*, *rsaL* and *rsaM* proteins (see lists below). The CLUSTAL program (accessed via the EBI Webportal, <http://www.ebi.ac.uk/Tools/msa/clustalw2/>) was used for constructing the multiple sequence alignments which were then processed by the HMMBUILD program to give HMM recognizers that were in turn used to scan the protein sequence data (over 4.7 million protein sequences). Sequences giving a E-value below 0.1 were manually checked for length, alignment coverage and residue conservation, and the topologies were assigned.

Protein sequences for selected sequence groups were downloaded from NCBI refseq database using a script which gave GIs as query and retrieved sequences in a file.

Cladograms for these selected sequence groups were built using the guide tree of the CLUSTAL program and visualized using the MEGA 5 program package installed from <http://www.megasoftware.net>.

The numerical value at each node indicates the bootstrap value supporting every split in the lineage (out of 1,000 bootstrap replicates).

**Table 1.** List of complete genomes in which QS genes were identified.

| No | Species                                                          | Gene/protein id |
|----|------------------------------------------------------------------|-----------------|
| 1  | <i>Erwinia pyrifoliae</i> Ep1/96                                 | ERWPE           |
| 2  | <i>Pectobacterium wasabiae</i> WPP163                            | PECWW           |
| 3  | <i>Halothiobacillus neapolitanus</i> c2                          | HALNC           |
| 4  | <i>Edwardsiella tarda</i> EIB202                                 | EDWTE           |
| 5  | <i>Dickeya dadantii</i> Ech586                                   | DICD5           |
| 6  | <i>Burkholderia</i> sp. CCGE1002                                 | BURSC           |
| 7  | <i>Burkholderia</i> sp. CCGE1001                                 | 9BURK           |
| 8  | <i>Citrobacter rodentium</i> ICC168                              | CITRI           |
| 9  | <i>Rhodomicrobium vannielii</i> ATCC 17100                       | RHOVT           |
| 10 | <i>Rhodopseudomonas palustris</i> DX-1                           | RHOPX           |
| 11 | <i>Burkholderia</i> sp. CCGE1003                                 | BURSG           |
| 12 | <i>Pantoea ananatis</i> LMG 20103                                | PANAM           |
| 13 | <i>Erwinia amylovora</i> CFBP1430                                | ERWAC           |
| 14 | <i>Erwinia amylovora</i> ATCC 49946                              | ERWAE           |
| 15 | <i>Sphingobium japonicum</i> UT26S                               | SPHJU           |
| 16 | <i>Shewanella violacea</i> DSS12                                 | SHEVD           |
| 17 | <i>Yersinia pestis</i> Z176003                                   | YERPZ           |
| 18 | <i>Rhodobacter capsulatus</i> SB 1003                            | RHO CB          |
| 19 | <i>Pantoea vagans</i> C9-1                                       | PANVC           |
| 20 | <i>Acinetobacter</i> sp. DR1                                     | ACISD           |
| 21 | <i>Ralstonia solanacearum</i> PSI07                              | RALSL           |
| 22 | <i>Ralstonia solanacearum</i> CFBP2957                           | RALSL           |
| 23 | <i>Erwinia billingiae</i> Eb661                                  | ERWBE           |
| 24 | <i>Gallionella capsiferriformans</i> ES-2                        | GALCS           |
| 25 | <i>Dickeya dadantii</i> 3937                                     | DICD3           |
| 26 | <i>Asticcacaulis excentricus</i> CB 48                           | ASTE C          |
| 27 | <i>Pantoea</i> sp. At-9b                                         | PANSA           |
| 28 | <i>Ralstonia solanacearum</i> GMI1000                            | RALSO           |
| 29 | <i>Bradyrhizobium japonicum</i> USDA 110                         | BRAJA           |
| 30 | <i>Mesorhizobium loti</i> MAFF303099                             | RHILO           |
| 31 | <i>Sinorhizobium meliloti</i> 1021                               | RHIME           |
| 32 | <i>Methylobacterium extorquens</i> AM1                           | METEA           |
| 33 | <i>Yersinia pestis</i> CO92                                      | YERPE           |
| 34 | <i>Acidithiobacillus ferrooxidans</i> ATCC 23270                 | ACIF2           |
| 35 | <i>Rhodospirillum rubrum</i> ATCC 11170                          | RHORT           |
| 36 | <i>Burkholderia mallei</i> ATCC 23344                            | BURMA           |
| 37 | <i>Burkholderia pseudomallei</i> K96243                          | BURPS           |
| 38 | <i>Yersinia enterocolitica</i> subsp. <i>enterocolitica</i> 8081 | YERE8           |

Table 1. Cont.

| No | Species                                                   | Gene/protein id |
|----|-----------------------------------------------------------|-----------------|
| 39 | <i>Burkholderia xenovorans</i> LB400                      | BURXL           |
| 40 | <i>Ruegeria pomeroyi</i> DSS-3                            | SILPO           |
| 41 | <i>Yersinia pestis</i> KIM 10                             | YERPE           |
| 42 | <i>Saccharophagus degradans</i> 2-40                      | SACD2           |
| 43 | <i>Pseudomonas syringae</i> pv. <i>syringae</i> B728a     | PSEU2           |
| 44 | <i>Pseudomonas aeruginosa</i> PAO1                        | PSEAE           |
| 45 | <i>Burkholderia cenocepacia</i> J2315                     | BURCJ           |
| 46 | <i>Rhizobium leguminosarum</i> bv. <i>viciae</i> 3841     | RHIL3           |
| 47 | <i>Pectobacterium atrosepticum</i> SCRI1043               | ERWCT           |
| 48 | <i>Pseudomonas syringae</i> pv. <i>tomato</i> str. DC3000 | PSESM           |
| 49 | <i>Pseudomonas aeruginosa</i> UCBPP-PA14                  | PSEAB           |
| 50 | <i>Chromobacterium violaceum</i> ATCC 12472               | CHRVO           |
| 51 | <i>Yersinia pestis</i> biovar <i>Microtus</i> str. 91001  | YERPE           |
| 52 | <i>Chelativorans</i> sp. BNC1                             | MESSB           |
| 53 | <i>Burkholderia</i> sp. 383                               | BURS3           |
| 54 | <i>Burkholderia vietnamiensis</i> G4                      | BURVG           |
| 55 | <i>Burkholderia thailandensis</i> E264                    | BURTA           |
| 56 | <i>Pseudomonas syringae</i> pv. <i>phaseolicola</i> 1448A | PSE14           |
| 57 | <i>Jannaschia</i> sp. CCS1                                | JANSC           |
| 58 | <i>Yersinia pseudotuberculosis</i> IP 32953               | YERPS           |
| 59 | <i>Vibrio fischeri</i> ES114                              | VIBF1           |
| 60 | <i>Paracoccus denitrificans</i> PD1222                    | PARDP           |
| 61 | <i>Agrobacterium vitis</i> S4                             | AGRVS           |
| 62 | <i>Agrobacterium radiobacter</i> K84                      | AGRKK           |
| 63 | <i>Pseudoalteromonas atlantica</i> T6c                    | PSEA6           |
| 64 | <i>Nitrobacter winogradskyi</i> Nb-255                    | NITWN           |
| 65 | <i>Burkholderia ambifaria</i> AMMD                        | BURCM           |
| 66 | <i>Sphingopyxis alaskensis</i> RB2256                     | SPHAL           |
| 67 | <i>Burkholderia cenocepacia</i> HI2424                    | BURCH           |
| 68 | <i>Burkholderia cenocepacia</i> AU 1054                   | BURCA           |
| 69 | <i>Rhizobium etli</i> CFN 42                              | RHIEC           |
| 70 | <i>Burkholderia mallei</i> NCTC 10229                     | BURM9           |
| 71 | <i>Burkholderia mallei</i> NCTC 10247                     | BURM7           |
| 72 | <i>Burkholderia mallei</i> SAVP1                          | BURMS           |
| 73 | <i>Burkholderia pseudomallei</i> 668                      | BURP6           |
| 74 | <i>Burkholderia pseudomallei</i> 1710b                    | BURP1           |
| 75 | <i>Acidovorax citrulli</i> AAC00-1                        | ACIAC           |
| 76 | <i>Rhodopseudomonas palustris</i> HaA2                    | RHOP2           |
| 77 | <i>Rhodopseudomonas palustris</i> BisB5                   | RHOPS           |
| 78 | <i>Rhodopseudomonas palustris</i> BisB18                  | RHOPB           |
| 79 | <i>Rhodopseudomonas palustris</i> BisA53                  | RHOP5           |
| 80 | <i>Geobacter uraniireducens</i> Rf4                       | GEOUR           |

Table 1. Cont.

| No  | Species                                                        | Gene/protein id |
|-----|----------------------------------------------------------------|-----------------|
| 81  | <i>Yersinia pestis</i> Angola                                  | YERPG           |
| 82  | <i>Yersinia pseudotuberculosis</i> IP 31758                    | YERP3           |
| 83  | <i>Bradyrhizobium</i> sp. BTAi1                                | BRASB           |
| 84  | <i>Burkholderia pseudomallei</i> 1106a                         | BURP0           |
| 85  | <i>Geobacter</i> sp. FRC-32                                    | GEOSF           |
| 86  | <i>Sinorhizobium medicae</i> WSM419                            | SINMW           |
| 87  | <i>Sodalis glossinidius</i> str. morsitans                     | SODGM           |
| 88  | <i>Roseobacter denitrificans</i> OCh 114                       | ROSDO           |
| 89  | <i>Yersinia pestis</i> Antiqua                                 | YERPA           |
| 90  | <i>Yersinia pestis</i> Nepal516                                | YERPN           |
| 91  | <i>Acidithiobacillus ferrooxidans</i> ATCC 53993               | ACIF5           |
| 92  | <i>Aeromonas hydrophila</i> subsp. <i>hydrophila</i> ATCC 7966 | AERHH           |
| 93  | <i>Yersinia pestis</i> Pestoides F                             | YERPP           |
| 94  | <i>Pseudomonas aeruginosa</i> PA7                              | PSEA7           |
| 95  | <i>Aeromonas salmonicida</i> subsp. <i>salmonicida</i> A449    | AERS4           |
| 96  | <i>Burkholderia phymatum</i> STM815                            | BURP8           |
| 97  | <i>Burkholderia ambifaria</i> MC40-6                           | BURA4           |
| 98  | <i>Dinoroseobacter shibae</i> DFL 12                           | DINSH           |
| 99  | <i>Shewanella woodyi</i> ATCC 51908                            | SHEWM           |
| 100 | <i>Serratia proteamaculans</i> 568                             | SERP5           |
| 101 | <i>Burkholderia phytofirmans</i> PsJN                          | BURPP           |
| 102 | <i>Acinetobacter baumannii</i> ATCC 17978                      | ACIBT           |
| 103 | <i>Acinetobacter baumannii</i> ACICU                           | ACIBC           |
| 104 | <i>Burkholderia cenocepacia</i> MC0-3                          | BURCC           |
| 105 | <i>Methylobacterium extorquens</i> PA1                         | METEP           |
| 106 | <i>Methylobacterium</i> sp. 4-46                               | METS4           |
| 107 | <i>Methylobacterium radiotolerans</i> JCM 2831                 | METRJ           |
| 108 | <i>Vibrio fischeri</i> MJ11                                    | VIBFM           |
| 109 | <i>Burkholderia multivorans</i> ATCC 17616                     | BURM1           |
| 110 | <i>Methylobacterium chloromethanicum</i> CM4                   | METC4           |
| 111 | <i>Methylobacterium populi</i> BJ001                           | METPB           |
| 112 | <i>Bradyrhizobium</i> sp. ORS278                               | BRASO           |
| 113 | <i>Phenylobacterium zucineum</i> HLK1                          | PHEZH           |
| 114 | <i>Rhizobium leguminosarum</i> bv. <i>trifolii</i> WSM1325     | RHILS           |
| 115 | <i>Rhodopseudomonas palustris</i> TIE-1                        | RHOPT           |
| 116 | <i>Rhizobium leguminosarum</i> bv. <i>trifolii</i> WSM2304     | RHILW           |
| 117 | <i>Methylobacterium nodulans</i> ORS 2060                      | METNO           |
| 118 | <i>Erwinia tasmaniensis</i> Et1/99                             | ERWT9           |
| 119 | <i>Beijerinckia indica</i> subsp. <i>indica</i> ATCC 9039      | BEII9           |
| 120 | <i>Sinorhizobium fredii</i> NGR234                             | RHISN           |
| 121 | <i>Acinetobacter baumannii</i> AB0057                          | ACIB5           |
| 122 | <i>Rhizobium etli</i> CIAT 652                                 | RHIE6           |
| 123 | <i>Yersinia pseudotuberculosis</i> YPIII                       | YERP3           |
| 124 | <i>Yersinia pseudotuberculosis</i> PB1/+                       | YERP3           |

**Table 1. Cont.**

| No  | Species                                                                  | Gene/protein id |
|-----|--------------------------------------------------------------------------|-----------------|
| 125 | <i>Aliivibrio salmonicida</i> LFI1238                                    | ALISL           |
| 126 | <i>Acinetobacter baumannii</i> AB307-0294                                | ACIB3           |
| 127 | <i>Pseudomonas aeruginosa</i> LESB58                                     | PSEA8           |
| 128 | Candidatus <i>Hamiltonella defensa</i> 5AT ( <i>Acyrtosiphon pisum</i> ) | HAMD5           |
| 129 | <i>Pectobacterium carotovorum</i> subsp. <i>carotovorum</i> PC1          | PECCP           |
| 130 | <i>Dickeya zeae</i> Ech1591                                              | DICZE           |
| 131 | <i>Desulfovibrio magneticus</i> RS-1                                     | DESMR           |
| 132 | <i>Burkholderia glumae</i> BGR1                                          | BURGB           |
| 133 | <i>Edwardsiella ictaluri</i> 93-146                                      | EDWI9           |
| 134 | <i>Methylocella silvestris</i> BL2                                       | METSB           |
| 135 | <i>Variovorax paradoxus</i> S110                                         | VARPS           |
| 136 | <i>Ketogulonicigenium vulgare</i> Y25                                    | KETVY           |
| 137 | <i>Enterobacter cloacae</i> SCF1                                         | ENTCS           |
| 138 | <i>Gluconacetobacter diazotrophicus</i> PAI 5                            | GLUDA           |
| 139 | <i>Methylobacterium extorquens</i> DM4                                   | METED           |
| 140 | <i>Acinetobacter baumannii</i> AYE                                       | ACIBY           |
| 141 | <i>Mesorhizobium ciceri</i> biovar <i>biserrulae</i> WSM1271             | MESCW           |
| 142 | <i>Rhodopseudomonas palustris</i> CGA009                                 | RHOPA           |
| 143 | <i>Collimonas fungivorans</i> Ter331                                     | COLFT           |
| 144 | <i>Cupriavidus necator</i> N-1                                           | CUPNE           |
| 145 | <i>Delftia</i> sp. Cs1-4                                                 | DELSC           |
| 146 | <i>Mesorhizobium opportunistum</i> WSM2075                               | MESOW           |
| 147 | <i>Novosphingobium</i> sp. PP1Y                                          | 9SPHN           |
| 148 | <i>Roseobacter litoralis</i> Och 149                                     | ROSLO           |
| 149 | <i>Sinorhizobium meliloti</i> AK83                                       | SINMK           |
| 150 | <i>Sphingobium chlorophenicum</i> L-1                                    | SPHCR           |
| 151 | <i>Sphingobium</i> sp. SYK-6                                             | 9SPHN           |
| 152 | <i>Vibrio anguillarum</i> 775                                            | VIBAN           |

**Table 2.** Additional sequences from incomplete genomes, used in this study.

| No. | Genome                   | DNA Ids                 | Protein ids                                                         |
|-----|--------------------------|-------------------------|---------------------------------------------------------------------|
| 1   | <i>P. fuscovaginae</i>   | 182375405,<br>290454884 | 182375406, 182375407, 182375408,<br>290454885, 290454886, 290454887 |
| 2   | <i>P. putida</i> PCL1445 | 73672740                | 73672742, 73672743, 73672744                                        |
| 3   | <i>P. putida</i> WCS358  | 45259341                | 45259342, 45259343, 45259344                                        |
| 4   | <i>P. putida</i> IsoF    | 26417537                | 26417540, 26417541, 26417542                                        |

**Table 3.** List of protein sequence sets used for building HMM recognizers.

| No                                                                                                                                                                                                                                                                                                                                                                                                                                                                                                                                                                                                                                                                                                                                                                                                                                                                                                                                                                                                                                                                                                                                                                                                                                                                                                                                                                                                                                                                                                                                                                                                                                                                                                                                                                                                                                                                                                                                                                                                                                                                                                                                                                                                                                                                                                                                                                                                                                                                                                                                                                                                                                                                                                                                                                                                                                                                                                                                                                                                                                                                                                        | Proteins | Gene/protein ids |
|-----------------------------------------------------------------------------------------------------------------------------------------------------------------------------------------------------------------------------------------------------------------------------------------------------------------------------------------------------------------------------------------------------------------------------------------------------------------------------------------------------------------------------------------------------------------------------------------------------------------------------------------------------------------------------------------------------------------------------------------------------------------------------------------------------------------------------------------------------------------------------------------------------------------------------------------------------------------------------------------------------------------------------------------------------------------------------------------------------------------------------------------------------------------------------------------------------------------------------------------------------------------------------------------------------------------------------------------------------------------------------------------------------------------------------------------------------------------------------------------------------------------------------------------------------------------------------------------------------------------------------------------------------------------------------------------------------------------------------------------------------------------------------------------------------------------------------------------------------------------------------------------------------------------------------------------------------------------------------------------------------------------------------------------------------------------------------------------------------------------------------------------------------------------------------------------------------------------------------------------------------------------------------------------------------------------------------------------------------------------------------------------------------------------------------------------------------------------------------------------------------------------------------------------------------------------------------------------------------------------------------------------------------------------------------------------------------------------------------------------------------------------------------------------------------------------------------------------------------------------------------------------------------------------------------------------------------------------------------------------------------------------------------------------------------------------------------------------------------------|----------|------------------|
| <b>luxI homologues</b>                                                                                                                                                                                                                                                                                                                                                                                                                                                                                                                                                                                                                                                                                                                                                                                                                                                                                                                                                                                                                                                                                                                                                                                                                                                                                                                                                                                                                                                                                                                                                                                                                                                                                                                                                                                                                                                                                                                                                                                                                                                                                                                                                                                                                                                                                                                                                                                                                                                                                                                                                                                                                                                                                                                                                                                                                                                                                                                                                                                                                                                                                    |          |                  |
| YP_002649215.1, YP_003261728.1, YP_003262850.1, YP_003296640.1, YP_003331715.1, YP_003608088.1, YP_004230809.1, YP_003366470.1, YP_004012993.1, YP_004106681.1, YP_004106954.1, YP_004108425.1, YP_003910269.1, YP_003520250.1, YP_003530770.1, YP_003538486.1, YP_003546445.1, YP_003558209.1, YP_003566926.1, YP_003568278.1, YP_003576501.1, YP_003729883.1, YP_003930460.1, YP_003734012.1, YP_003749682.1, YP_003750860.1, YP_003744153.1, YP_003740503.1, YP_003740954.1, YP_003847234.1, YP_003885141.1, YP_004088230.1, YP_004115279.1, NP_521405.1, NP_522340.1, NP_767703.1, NP_106262.1, NP_106661.1, NP_109412.1, NP_385945.1, YP_002965845.1, YP_002966879.1, YP_002346031.1, YP_002347420.1, YP_002426405.1, YP_428477.1, YP_105963.1, YP_106161.1, YP_110894.1, YP_111576.1, YP_001005892.1, YP_554693.1, YP_555669.1, YP_165635.1, YP_167511.1, NP_669050.1, NP_670673.1, YP_528965.1, YP_234707.1, NP_250123.1, NP_252166.1, YP_002232872.1, YP_002234481.1, YP_768958.1, YP_048233.1, NP_793636.1, YP_789671.1, YP_791820.1, NP_903761.1, NP_993604.1, NP_994737.1, YP_674865.1, YP_371808.1, YP_567542.1, YP_569311.1, YP_530592.1, YP_531903.1, YP_781244.1, YP_273860.1, YP_508562.1, YP_071011.1, YP_071751.1, YP_206882.1, YP_914595.1, YP_002551489.1, YP_002549360.1, YP_002541324.1, YP_659946.1, YP_317245.1, YP_776005.1, YP_617566.1, YP_617628.1, YP_838353.1, YP_623506.1, YP_470411.1, YP_473057.1, YP_001024425.1, YP_001025818.1, YP_001077901.1, YP_001078152.1, YP_989942.1, YP_001062290.1, YP_001063210.1, YP_335777.1, YP_337633.1, YP_972130.1, YP_484039.1, YP_486927.1, YP_567542.1, YP_569311.1, YP_530592.1, YP_531903.1, YP_781244.1, YP_001231849.1, YP_001604809.1, YP_001606209.1, YP_001399709.1, YP_001400525.1, YP_001220569.1, YP_001241094.1, YP_001242901.1, YP_001075256.1, YP_001076162.1, YP_002537871.1, YP_001327237.1, YP_453964.1, YP_681952.1, YP_650194.1, YP_651865.1, YP_647981.1, YP_649109.1, YP_002220095.1, YP_855089.1, YP_001161918.1, YP_001163229.1, YP_001347034.1, YP_001349251.1, YP_001143471.1, YP_001583944.1, YP_001860597.1, YP_001811255.1, YP_001531662.1, YP_001534185.1, YP_001761364.1, YP_001476305.1, YP_001888022.1, YP_001893789.1, YP_001083198.1, YP_001844795.1, YP_001777918.1, YP_001779189.1, YP_001641952.1, YP_001772211.1, YP_001758390.1, YP_001776814.1, YP_001783295.1, YP_002158590.1, YP_001948920.1, YP_002423669.1, YP_001927659.1, YP_001203094.1, YP_002128524.1, YP_002976728.1, YP_001989358.1, YP_001991324.1, YP_002282165.1, YP_002495630.1, YP_002496260.1, YP_002497058.1, YP_001906897.1, YP_001908005.1, YP_001832057.1, YP_002826208.1, YP_002317565.1, YP_001979200.1, YP_001985290.1, YP_001719546.1, YP_001720402.1, YP_001873009.1, YP_001873806.1, YP_002265246.1, YP_002327281.1, YP_002439140.1, YP_002441565.1, YP_002923740.1, YP_003019698.1, YP_003002473.1, YP_002955226.1, YP_002909043.1, YP_002934276.1, YP_002360442.1, YP_002947663.1, YP_003964946.1, YP_003941574.1, YP_001603070.1, YP_003070966.1, YP_001715479.1, YP_004144716.1, YP_004145051.1, NP_945673.1 |          |                  |
| <b>LuxR homologues</b>                                                                                                                                                                                                                                                                                                                                                                                                                                                                                                                                                                                                                                                                                                                                                                                                                                                                                                                                                                                                                                                                                                                                                                                                                                                                                                                                                                                                                                                                                                                                                                                                                                                                                                                                                                                                                                                                                                                                                                                                                                                                                                                                                                                                                                                                                                                                                                                                                                                                                                                                                                                                                                                                                                                                                                                                                                                                                                                                                                                                                                                                                    |          |                  |
| YP_002649216.1, YP_003261727.1, YP_003262848.1, YP_003296639.1, YP_003331714.1, YP_003608086.1, YP_004230807.1, YP_003366469.1, YP_004012994.1, YP_004106680.1, YP_004106955.1, YP_004108424.1, YP_003910271.1, YP_003520251.1, YP_003530769.1, YP_003538485.1, YP_003546444.1, YP_003558208.1, YP_003566925.1, YP_003568279.1, YP_003576500.1, YP_003729882.1, YP_003930459.1, YP_003734010.1, YP_003749681.1, YP_003750859.1, YP_003744152.1, YP_003740504.1, YP_003740953.1, YP_003847232.1, YP_003885142.1, YP_004088229.1, YP_004115278.1, NP_521406.1, NP_522339.1, NP_767702.1, NP_106261.1, NP_106660.1, NP_109411.1, NP_385944.1, YP_002965846.1, YP_002966880.1, YP_002346032.1, YP_002347421.1, YP_002426403.1, YP_428476.1, YP_105961.1, YP_106160.1, YP_110896.1, YP_111575.1, YP_001005891.1, YP_554691.1, YP_555670.1, YP_165634.1, YP_167510.1, NP_669049.1, NP_670674.1, YP_528967.1, YP_234708.1, NP_250121.1, NP_252167.1, YP_002232873.1, YP_002234479.1, YP_768957.1, YP_048234.1, NP_793635.1, YP_789670.1, YP_791822.1, NP_903760.1, NP_993605.1, NP_994736.1, YP_674864.1, YP_371810.1, YP_001114942.1, YP_001117674.1, YP_439002.1, YP_439706.1, YP_273861.1, YP_508561.1, YP_071012.1, YP_071752.1, YP_206883.1, YP_914594.1, YP_002551488.1, YP_002549361.1, YP_002541325.1, YP_659944.1, YP_317246.1, YP_776003.1, YP_617565.1, YP_617627.1, YP_838351.1, YP_623508.1, YP_470410.1, YP_473056.1, YP_001024423.1, YP_001025820.1, YP_001077903.1, YP_001078154.1, YP_989940.1, YP_001062292.1, YP_001063209.1, YP_335776.1, YP_337635.1, YP_972129.1, YP_484040.1, YP_486928.1, YP_567541.1, YP_569310.1, YP_530593.1, YP_531902.1, YP_781245.1, YP_001231850.1, YP_001604810.1, YP_001606210.1, YP_001399708.1, YP_001400524.1, YP_001220570.1, YP_001241092.1, YP_001242900.1, YP_001075258.1, YP_001076161.1, YP_002537872.1, YP_001327236.1, YP_453965.1, YP_681951.1, YP_650193.1, YP_651866.1, YP_647982.1, YP_649110.1, YP_002220093.1, YP_855090.1, YP_001161917.1, YP_001163230.1, YP_001347033.1, YP_001349253.1, YP_001143472.1, YP_001583946.1, YP_001860599.1, YP_001811253.1, YP_001531661.1, YP_001534186.1, YP_001761363.1, YP_001476304.1, YP_001888024.1, YP_001893790.1, YP_001083200.1, YP_001844797.1, YP_001777917.1, YP_001779191.1, YP_001641953.1, YP_001772212.1, YP_001758389.1, YP_001776815.1, YP_001783296.1, YP_002158591.1, YP_001948918.1, YP_002423670.1, YP_001927660.1, YP_001203095.1, YP_002128523.1, YP_002976727.1, YP_001989359.1, YP_001991323.1, YP_002282164.1, YP_002495629.1, YP_002496262.1, YP_002497059.1, YP_001906896.1, YP_001908006.1, YP_001832058.1, YP_002826207.1, YP_002317567.1, YP_001979199.1, YP_001985289.1, YP_001719545.1, YP_001720401.1, YP_001873010.1, YP_001873807.1, YP_002265247.1, YP_002327279.1, YP_002439139.1, YP_002441567.1, YP_002923741.1, YP_003019697.1, YP_003002472.1, YP_002955225.1, YP_002909041.1, YP_002934275.1, YP_002360441.1, YP_002947664.1, YP_003964947.1, YP_003941575.1, YP_001603072.1, YP_003070967.1, YP_001715477.1, YP_004144717.1, YP_004145052.1, NP_945674.1,       |          |                  |
| <b>RsaL homologue</b>                                                                                                                                                                                                                                                                                                                                                                                                                                                                                                                                                                                                                                                                                                                                                                                                                                                                                                                                                                                                                                                                                                                                                                                                                                                                                                                                                                                                                                                                                                                                                                                                                                                                                                                                                                                                                                                                                                                                                                                                                                                                                                                                                                                                                                                                                                                                                                                                                                                                                                                                                                                                                                                                                                                                                                                                                                                                                                                                                                                                                                                                                     |          |                  |
| NP_250122.1, YP_001349252.1, YP_001860598.1, YP_001888023.1, YP_002441566.1, YP_002794907.1, YP_003608087.1, YP_003847233.1, YP_003910270.1, YP_554692.1, YP_791821.1                                                                                                                                                                                                                                                                                                                                                                                                                                                                                                                                                                                                                                                                                                                                                                                                                                                                                                                                                                                                                                                                                                                                                                                                                                                                                                                                                                                                                                                                                                                                                                                                                                                                                                                                                                                                                                                                                                                                                                                                                                                                                                                                                                                                                                                                                                                                                                                                                                                                                                                                                                                                                                                                                                                                                                                                                                                                                                                                     |          |                  |
| <b>RsaM homologues</b>                                                                                                                                                                                                                                                                                                                                                                                                                                                                                                                                                                                                                                                                                                                                                                                                                                                                                                                                                                                                                                                                                                                                                                                                                                                                                                                                                                                                                                                                                                                                                                                                                                                                                                                                                                                                                                                                                                                                                                                                                                                                                                                                                                                                                                                                                                                                                                                                                                                                                                                                                                                                                                                                                                                                                                                                                                                                                                                                                                                                                                                                                    |          |                  |
| YP_439707.1, YP_001062653.1, YP_776004.1, YP_001117675.1                                                                                                                                                                                                                                                                                                                                                                                                                                                                                                                                                                                                                                                                                                                                                                                                                                                                                                                                                                                                                                                                                                                                                                                                                                                                                                                                                                                                                                                                                                                                                                                                                                                                                                                                                                                                                                                                                                                                                                                                                                                                                                                                                                                                                                                                                                                                                                                                                                                                                                                                                                                                                                                                                                                                                                                                                                                                                                                                                                                                                                                  |          |                  |
